# Supplementary material for: Wnt activation disturbs cell competition and causes diffuse invasion of transformed cells through NF-κB-MMP21 pathway
Source: PubMed Central journal article supplement (PMC10624923; doi:10.1038/s41467-023-42774-6), 2023-11-03
Supplement: 41467_2023_42774_MOESM1_ESM.pdf [file 41467_2023_42774_MOESM1_ESM.pdf]

Supplementary information for  
**Wnt activation disturbs cell competition and causes diffuse invasion of  
transformed cells through NF- $\kappa$ B-MMP21 pathway**

Kazuki Nakai, Hancheng Lin, Shotaro Yamano, Shinya Tanaka, Sho Kitamoto, Hitoshi Saitoh, Kenta Sakuma, Junpei Kurauchi, Eilma Akter, Masamitsu Konno, Kojiro Ishibashi, Ryo Kamata, Akihiro Ohashi, Jun Koseki, Hirotaka Takahashi, Hideshi Yokoyama, Yukihiro Shiraki, Atsushi Enomoto, Sohei Abe, Yoku Hayakawa, Tetsuo Ushiku, Michihiro Mutoh, Yasuyuki Fujita & Shunsuke Kon.

Supplementary information  
Supplementary Figures 1-10  
Supplementary Tables 1-2

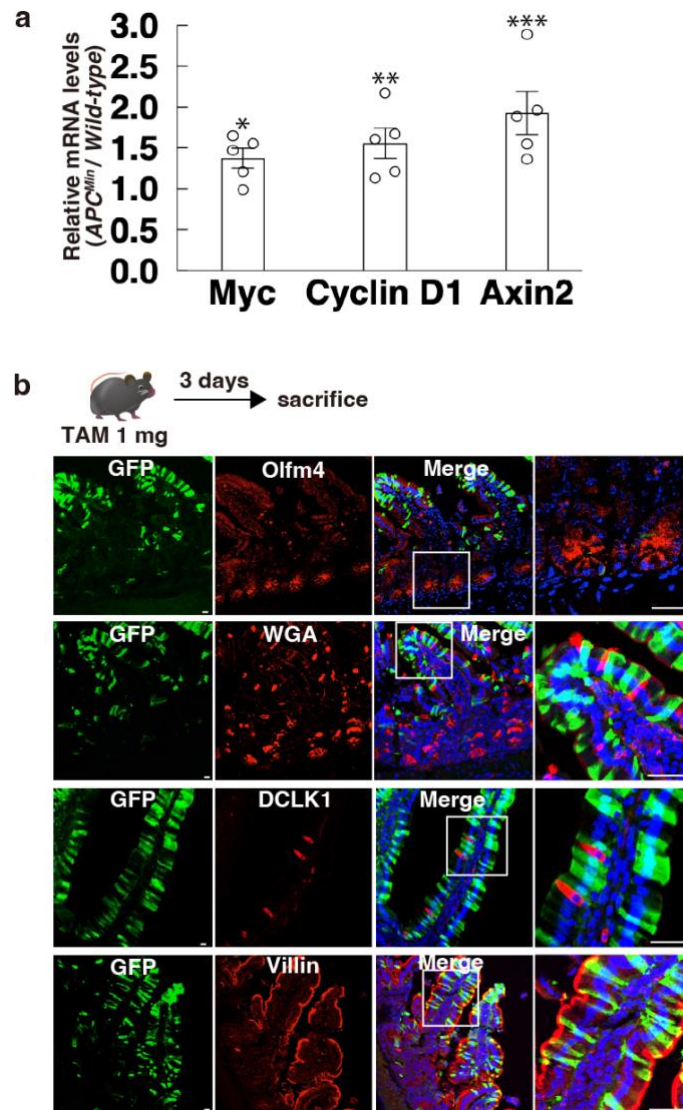

**Supplementary Fig. 1. Wnt activation by APC-ablation and tamoxifen-induced expression of transgenes in a cell competition mouse model. (a)** Effect of APC-ablation on mRNA levels of Wnt-target genes. mRNA was extracted from intestinal organoids genotyped as *wild-type* or *APC<sup>Min</sup>* mice and subjected to q-PCR analyses. The primers used are listed in Supplementary Table 1. Values are shown as fold changes in *APC<sup>Min</sup>* cells relative to *wild-type* cells. Data are mean  $\pm$  s.e.m.  $n =$  five independent experiments. \* $P=0.0367$ ; \*\* $P=0.0442$ ; \*\*\* $P=0.0248$ , unpaired two-tailed  $t$ -test. **(b)** Immunofluorescence images of intestinal villi from *Villin-GFP* mice 3 days after low-dose tamoxifen injection. The sliced sections were prepared, and were stained with DAPI (blue), GFP antibody (green) and Olfm4, WGA, DCLK1 or Villin antibody (red). Note that GFP expression is overlapped with Villin-expressing differentiated enterocytes, but not with other lineage markers. Scale bars, 50  $\mu$ m.

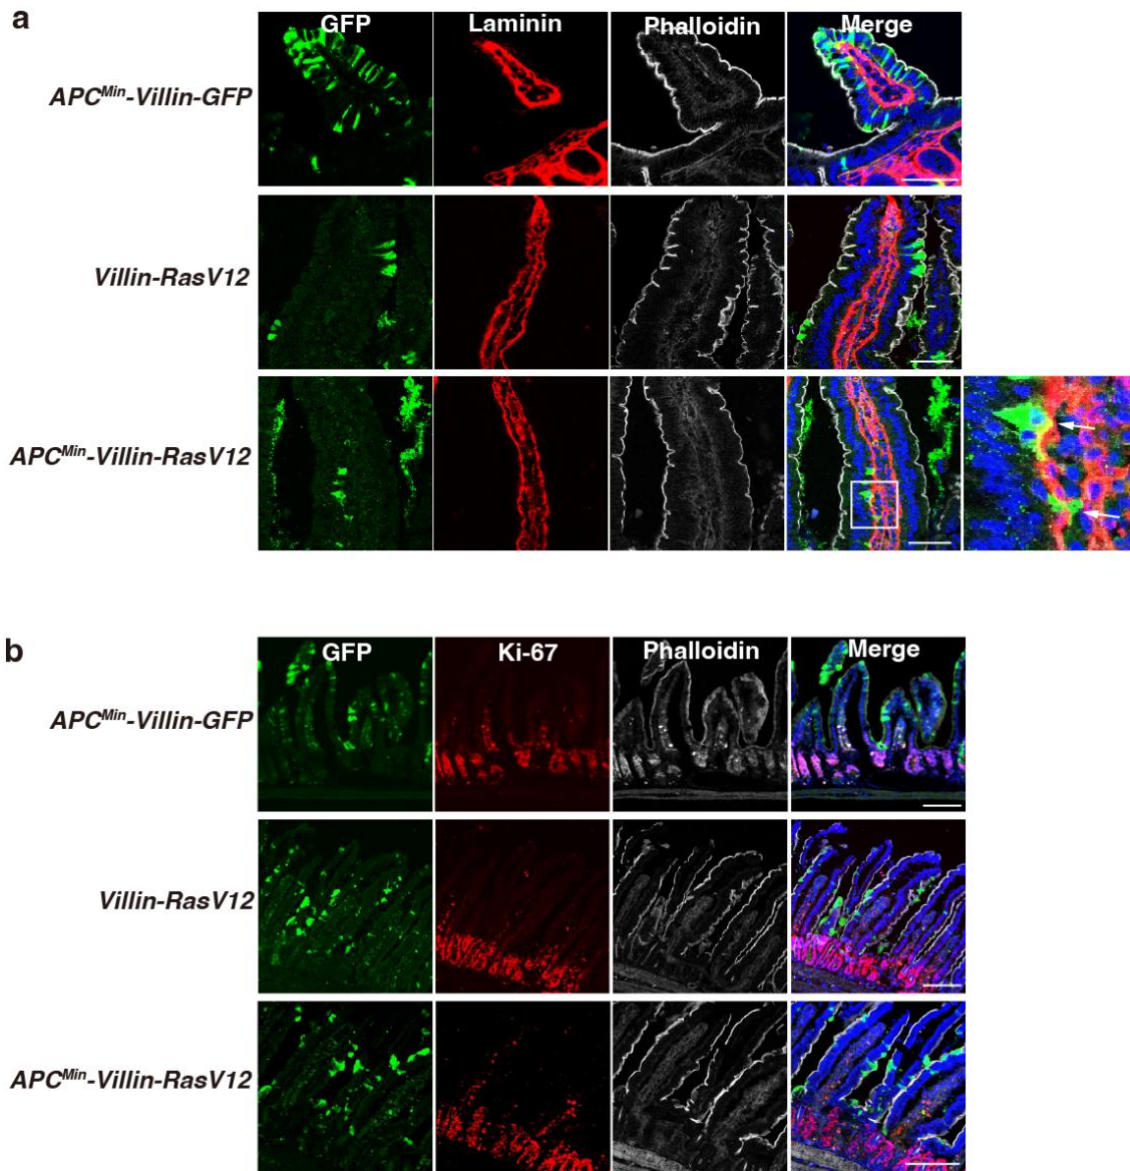

**Supplementary Fig. 2. Invasive and proliferative capacity of APC<sup>Min</sup>/RasV12-transformed cells.** (a, b) Immunofluorescence images of laminin (a) or Ki-67 (b) in the small intestine of *APC<sup>Min</sup>-Villin-GFP*, *Villin-RasV12* or *APC<sup>Min</sup>-Villin-RasV12* mice at 3 days after 1 mg tamoxifen administration. The sliced sections were prepared, and were stained with DAPI (blue), GFP antibody (green), laminin antibody (a, red) or Ki-67 antibody (b, red) and phalloidin (white). Scale bars, 50  $\mu$ m (a) and 100  $\mu$ m (b). A white square in (a) highlights APC<sup>Min</sup>/RasV12-transformed cells penetrating laminin-positive basement membrane (white arrows).

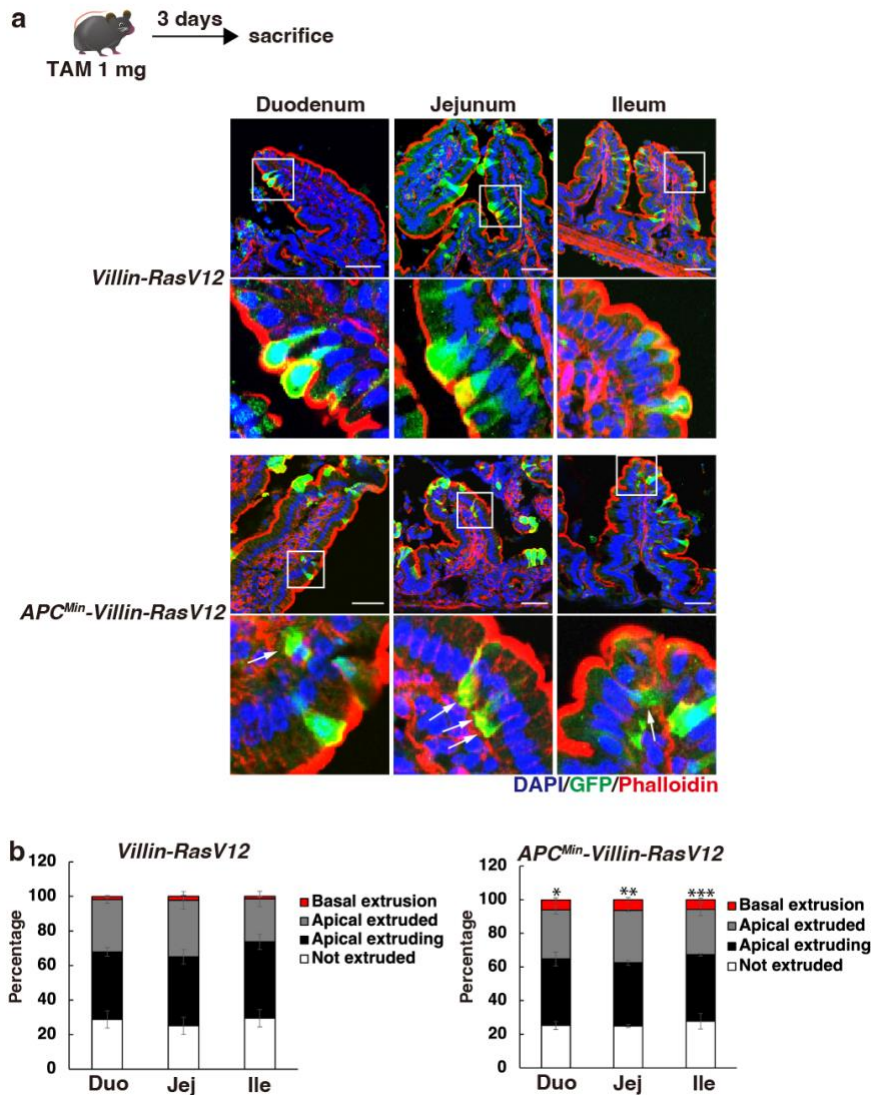

**Supplementary Fig. 3. Basal extrusion of APC<sup>Min</sup>/RasV12-transformed cells occurs at a similar frequency throughout the small intestine.** (a) Confocal microscopic images of duodenum, jejunum or ileum from *Villin-RasV12* or *APC<sup>Min</sup>-Villin-RasV12* mice. *Villin-RasV12* or *APC<sup>Min</sup>-Villin-RasV12* mice were injected with 1 mg tamoxifen and were sacrificed 3 days later. Frozen sections were stained with DAPI (blue), anti-GFP antibody (green) and phalloidin (red). White squares in the top images are magnified in the corresponding panels below. White arrows depict the basally extruded cells. Scale bars, 50  $\mu$ m. (b) Quantification of apical and basal extrusion of transformed cells in duodenum (Duo), jejunum (Jej) or ileum (Ile). Data are mean  $\pm$  s.e.m.  $n =$  three independent experiments. \* $P=0.0304$ ; \*\* $P=0.0435$ ; \*\*\* $P=0.0402$  for basally extruded cells between RasV12- and APC<sup>Min</sup>/RasV12-expressing cells, unpaired two-tailed  $t$ -test.

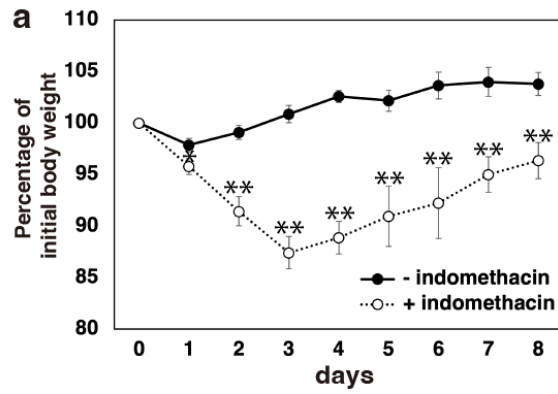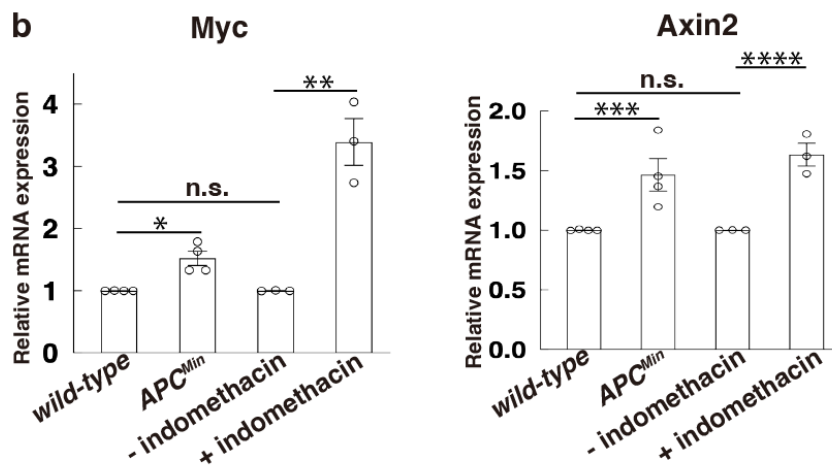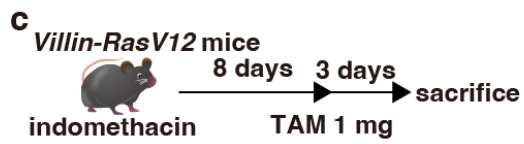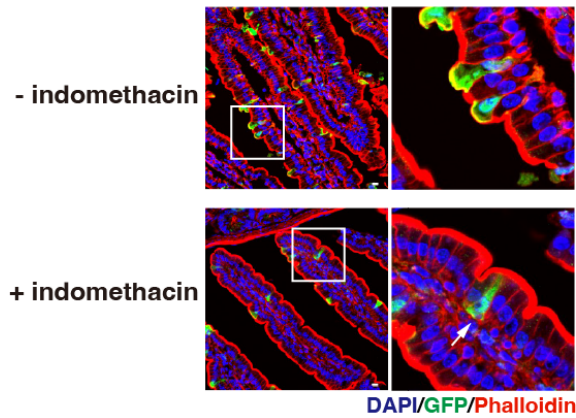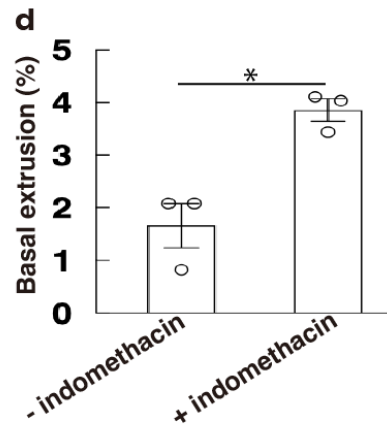

**Supplementary Fig. 4. Tissue injury-induced Wnt activation leads to basal extrusion of APC<sup>Min</sup>/RasV12-transformed cells.** (a) Effect of indomethacin administration on mouse body weight. Mice were subcutaneously administered either vehicle (5% NaHCO<sub>3</sub>) or indomethacin (12.5 mg kg<sup>-1</sup>) and weighed daily. Data are mean ± s.e.m. *n* = five independent experiments. \**P*=0.0456; \*\**P*<0.01, unpaired two-tailed *t*-test. (b) Effect of tissue injury by indomethacin on mRNA levels of Wnt-target genes. mRNA was extracted from the small intestine of *wild-type*, *APC<sup>Min</sup>*, or vehicle- or indomethacin-treated mice and subjected to q-PCR analyses. Fold changes relative to *wild-type* mice are presented. Data are mean ± s.e.m. *n* = three or four independent experiments. \**P*=0.0199; \*\**P*=0.0238; \*\*\**P*=0.0424; \*\*\*\**P*=0.0223, unpaired two-tailed *t*-test. (c, d) Effect of indomethacin administration on the cell fates of RasV12-transformed cells. (c) Immunofluorescence images of intestinal villi from *Villin-RasV12* mice administered with vehicle or indomethacin. Magnified images depict apical or basal extrusion of transformed cells from vehicle- or indomethacin-administered mice, respectively. An arrow indicates a basally extruded cell. Scale bars, 10 μm (c). (d) Quantification of basal extrusion of RasV12-transformed cells in vehicle- or indomethacin-treated mice. Data are mean ± s.e.m. *n* = three independent experiments. \**P*=0.0095 between the vehicle- and indomethacin-administrated group, unpaired two-tailed *t*-test.

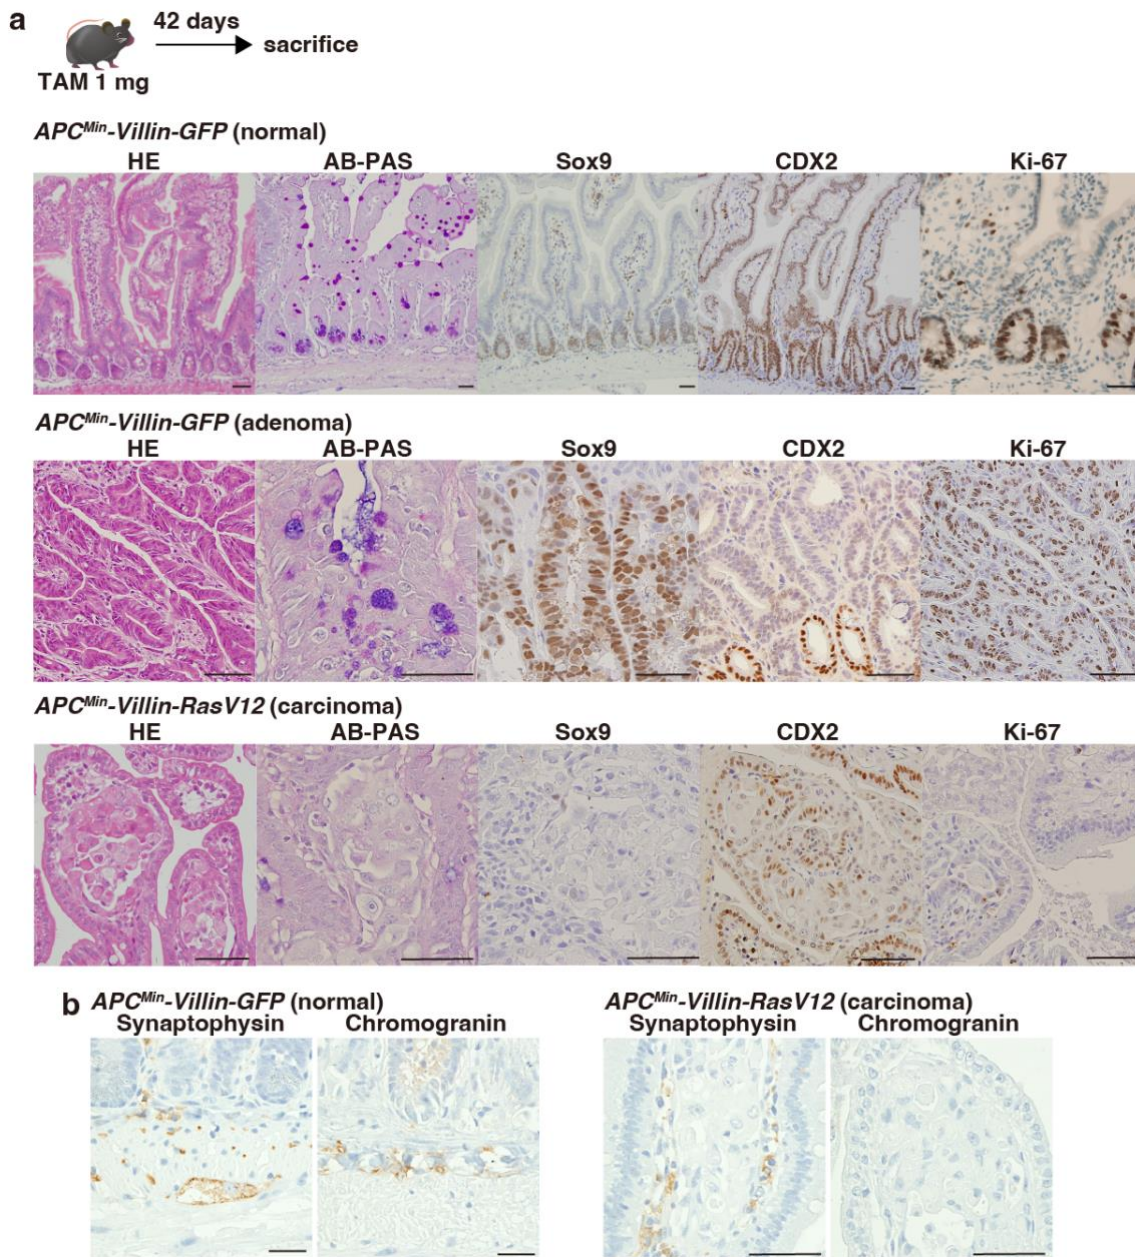

**Supplementary Fig. 5. Characteristic profiling of *APC<sup>Min</sup>/RasV12*-transformed carcinoma cells. (a, b) HE and immunostaining of intestinal villi from normal *APC<sup>Min</sup>-Villin-GFP*, adenoma-bearing *APC<sup>Min</sup>-Villin-GFP* or carcinoma-developing *APC<sup>Min</sup>-Villin-RasV12* mice at 42 days after tamoxifen administration. Paraffin-embedded sections were processed for HE staining, or were stained with AB-PAS (purple), Sox9, CDX2 or Ki-67 antibody (brown) in (a). In (b), sections were stained with Synaptophysin or Chromogranin (brown) and were counterstained with methyl green. Scale bars, 50  $\mu$ m (a, b).**

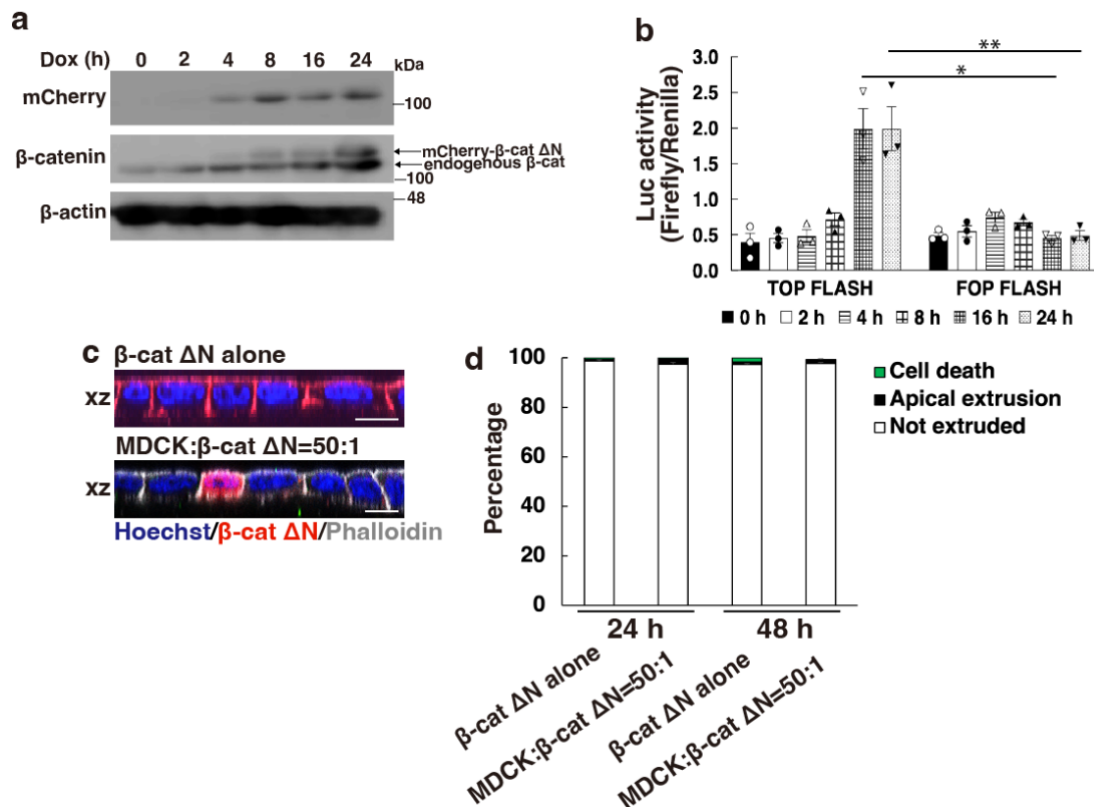

**Supplementary Fig. 6. Wnt-activated cells are not eliminated by cell competition in MDCK cells.** (a) Establishment of MDCK-pTRE3G mCherry-β-cateninΔ131 cells. Doxycycline-induced expression of mCherry-β-cateninΔ131 is determined by western blotting. (b) TOP FLASH reporter assay. MDCK-pTRE3G mCherry-β-cateninΔ131 cells were co-transfected with TOP FLASH or FOP FLASH and Renilla expressing vector, and were lysed and subjected to measurement of luciferase activity. Data are mean ± s.e.m.  $n =$  three independent experiments.  $*P=0.0059$ ;  $**P=0.0088$ , unpaired two-tailed  $t$ -test. (c) Immunofluorescence images of  $xz$  sections of MDCK-pTRE3G mCherry-β-cateninΔ131 cells cultured alone or surrounded by normal MDCK cells. Scale bars, 10 μm. (d) Quantification of the cell fates of MDCK-pTRE3G mCherry-β-cateninΔ131 cells cultured alone or surrounded by normal MDCK cells at 24 or 48 h after doxycycline addition. Data are mean ± s.e.m.  $n =$  three independent experiments.



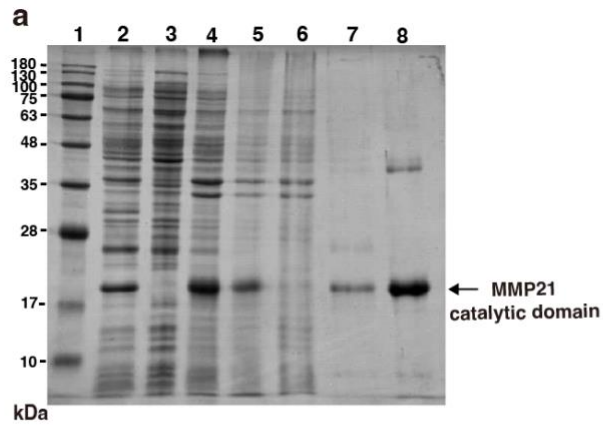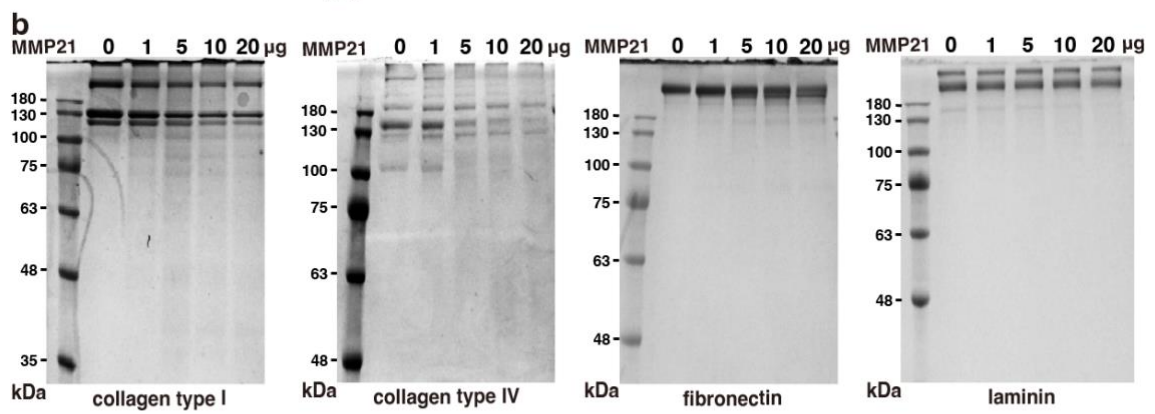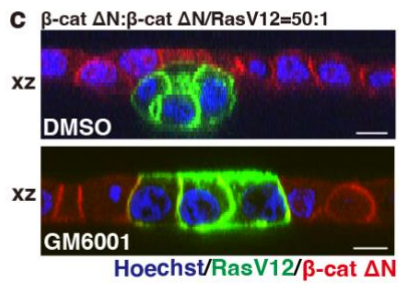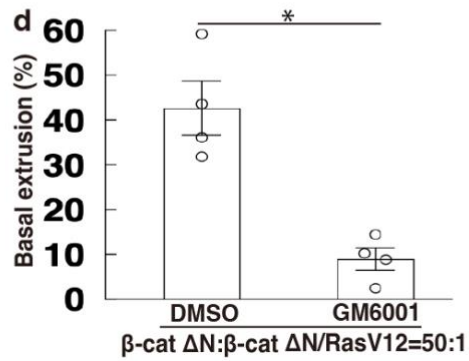

**Supplementary Fig. 7. MMP21 cleaves several extracellular matrix substrates and regulates basal extrusion of transformed cells.**

**(a)** Purification of MMP21 catalytic domain. A SDS-PAGE image shows purification process from the lysate to the final product. Lanes: 1, molecular marker; 2, induced protein extract; 3, soluble fraction before guanidine hydrochloride treatment; 4, insoluble fraction before guanidine hydrochloride treatment; 5, soluble fraction after guanidine hydrochloride treatment; 6, flow-through fraction from Ni-NTA resin; 7, wash-out fraction from Ni-NTA resin; 8, elute from Ni-NTA resin by 500 mM imidazole. The molecular mass of MMP21 catalytic domain-His is indicated by an arrow. **(b)** Degradation of ECM substrates by the MMP21 catalytic domain. Collagen type I, collagen type IV, fibronectin and laminin were incubated with buffer alone or with 1, 5, 10 or 20  $\mu\text{g}$  of the MMP21 catalytic domain. The digestion products were analyzed by SDS-PAGE under reducing condition and stained with Coomassie Blue after electrophoresis. The sizes of molecular weight markers are shown to the left. **(c)** Confocal images of  $xz$  sections of MDCK-pTR GFP-RasV12 mCherry- $\beta$ -catenin $\Delta$ 131 cells surrounded by MDCK mCherry- $\beta$ -catenin $\Delta$ 131 cells in the absence or presence of 25  $\mu\text{M}$  GM6001. Scale bars, 10  $\mu\text{m}$ . **(d)** Quantification of basal extrusion of  $\beta$ -cat  $\Delta$ N/RasV12 cells in the absence or presence of GM6001. Data are mean  $\pm$  s.e.m.  $n =$  four independent experiments.  $*P=0.0021$ , unpaired two-tailed  $t$ -test.

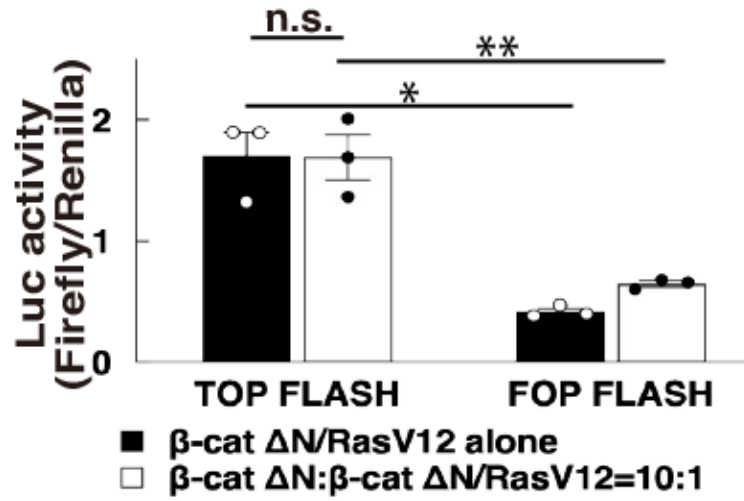

**Supplementary Fig. 8. Wnt activity is not changed in β-cat ΔN/RasV12 cells surrounded by β-cat ΔN cells.** MDCK-pTR GFP-RasV12 mCherry-β-cateninΔ131 cells were co-transfected with TOP FLASH or FOP FLASH and Renilla expressing vector, and were cultured alone or co-cultured with MDCK mCherry-β-cateninΔ131. After lysis, cells were subjected to measurement of luciferase activity. Data are mean ± s.e.m.  $n =$  three independent experiments. \* $P=0.0197$ ; \*\* $P=0.0291$ , unpaired two-tailed  $t$ -test.

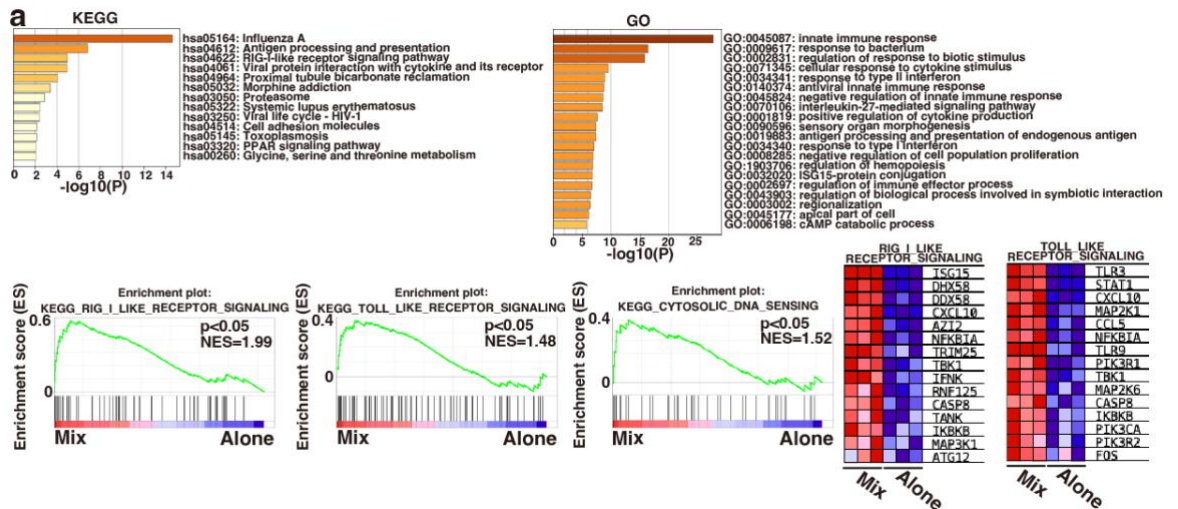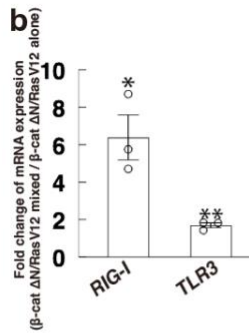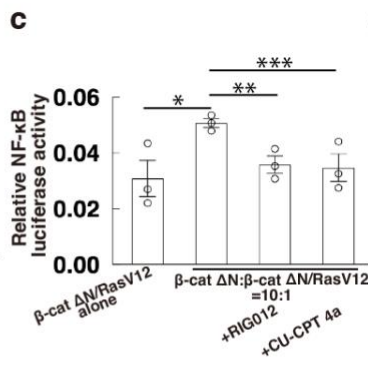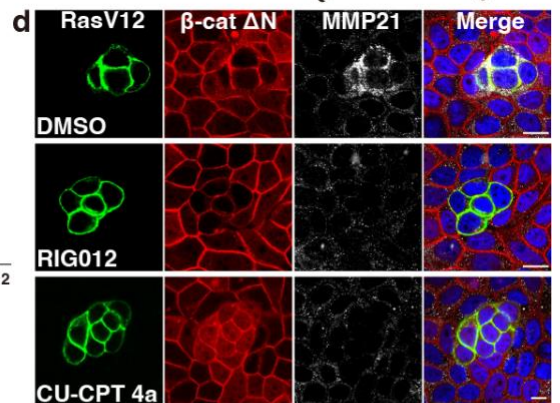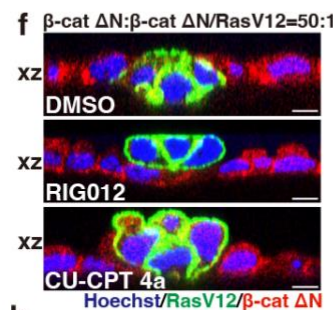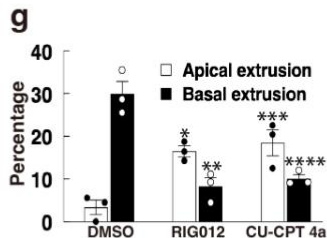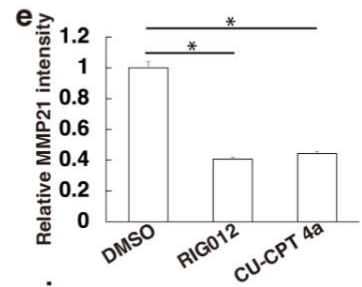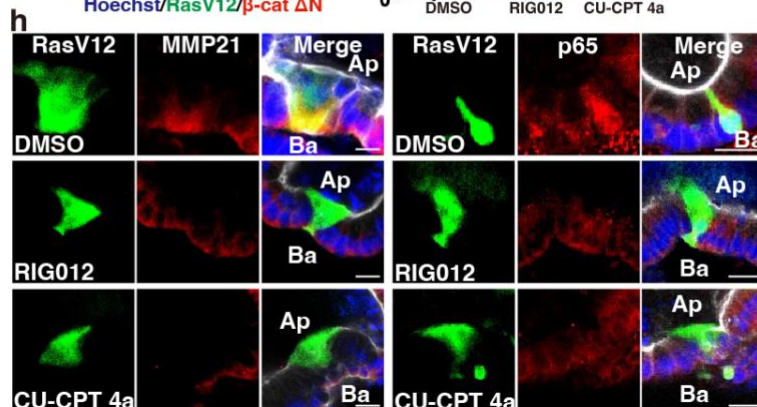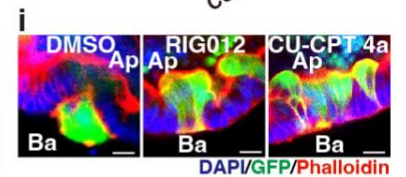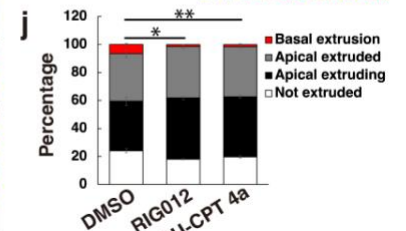

**Supplementary Fig. 9. Innate immune response governs the basal extrusion of transformed cells via NF- $\kappa$ B-MMP21 pathway.** (a) KEGG and GO enrichment analyses (upper), showing the top clusters colored according to the *P*-value. GSEA plots (lower left) showing a significant correlation between the transcriptional profile of  $\beta$ -cat  $\Delta$ N/RasV12 cells co-cultured with  $\beta$ -cat  $\Delta$ N cells and RIG-I, TLR or DNA sensing pathway gene signatures. Heatmap shows top 15 marker genes for RIG-I or TLR signaling (lower right). Expression values are represented as colors and range from red to blue based on the expression level. (b) q-PCR analysis of RIG-I and TLR3 in  $\beta$ -cat  $\Delta$ N/RasV12 cells surrounded by  $\beta$ -cat  $\Delta$ N cells.  $\beta$ -cat  $\Delta$ N/RasV12 cells were co-cultured with  $\beta$ -cat  $\Delta$ N cells or cultured alone, and subjected to q-PCR analysis. Values are shown as fold change in  $\beta$ -cat  $\Delta$ N/RasV12 cells surrounded by  $\beta$ -cat  $\Delta$ N cells relative to  $\beta$ -cat  $\Delta$ N/RasV12 cells cultured alone. Data are mean  $\pm$  s.e.m. *n* = three independent experiments. \**P*=0.0460; \*\**P*=0.0395, unpaired two-tailed *t*-test. (c-g) Effect of RIG012 or CU-CPT 4a on NF- $\kappa$ B activity, MMP21 expression and cell fates of  $\beta$ -cat  $\Delta$ N/RasV12 cells. (c) NF- $\kappa$ B reporter assay.  $\beta$ -cat  $\Delta$ N/RasV12 cells were co-transfected with NF- $\kappa$ B luciferase reporter and Renilla expressing vector, and were co-cultured with  $\beta$ -cat  $\Delta$ N cells or cultured alone in the absence or presence of 2.5  $\mu$ M RIG012 or 50  $\mu$ M CU-CPT 4a. After lysis, cells were subjected to measurement of luciferase activity. Data are mean  $\pm$  s.e.m. *n* = three independent experiments. \**P*=0.0407; \*\**P*=0.0364; \*\*\**P*=0.0133, unpaired two-tailed *t*-test. (d) Immunofluorescence images of MMP21 in the absence or presence of RIG012 or CU-CPT 4a.  $\beta$ -cat  $\Delta$ N/RasV12 cells were mixed with  $\beta$ -cat  $\Delta$ N cells in the presence of BFA, and were treated with DMSO, RIG012 or CU-CPT 4a. Cells were stained with Hoechst 33342 (blue) and anti-MMP21 antibody (white). (e) Quantification of fluorescence intensity of MMP21. Values are expressed as a ratio relative to DMSO treatment. Data are mean  $\pm$  s.e.m. \**P*<0.001, unpaired two-tailed *t*-test; *n* = 364, 396 and 445 cells pooled from three independent experiments. (f) Immunofluorescence images of *xz* sections of MDCK-pTR GFP-RasV12 mCherry- $\beta$ -catenin $\Delta$ 131 cells surrounded by MDCK mCherry- $\beta$ -catenin $\Delta$ 131 cells in the absence or presence of RIG012 or CU-CPT 4a. (g) Quantification of apical and basal extrusion in the absence or presence of RIG012 or CU-CPT 4a. Data are mean  $\pm$  s.e.m. *n* = three independent experiments. \**P*=0.0046; \*\**P*=0.0055; \*\*\**P*=0.0208; \*\*\*\**P*=0.0144, unpaired two-tailed *t*-test. (h-j) Effect of innate immunity inhibition on MMP21, p65 expression and the cell fates *ex vivo*. (h) Immunofluorescence images of MMP21 or p65 in intestinal organoids from *APC<sup>Min</sup>-Villin-RasV12* mice in the absence or presence of 10  $\mu$ M RIG012 or 100  $\mu$ M CU-CPT 4a. (i) Immunofluorescence images of intestinal organoids treated with 100 nM tamoxifen and cultured for 24 h in the absence or presence of RIG012 or CU-CPT 4a. Ba and Ap stand for the basal and apical sides, respectively (h, i). Scale bars, 10  $\mu$ m (d, f, h, i). (j) Quantification of apical and basal extrusion. Data are mean  $\pm$  s.e.m. *n* = three independent experiments. \**P*=0.0233; \*\**P*=0.0150 for basally extruded cells between DMSO- and RIG012- or CU-CPT 4a-treated group, unpaired two-tailed *t*-test.

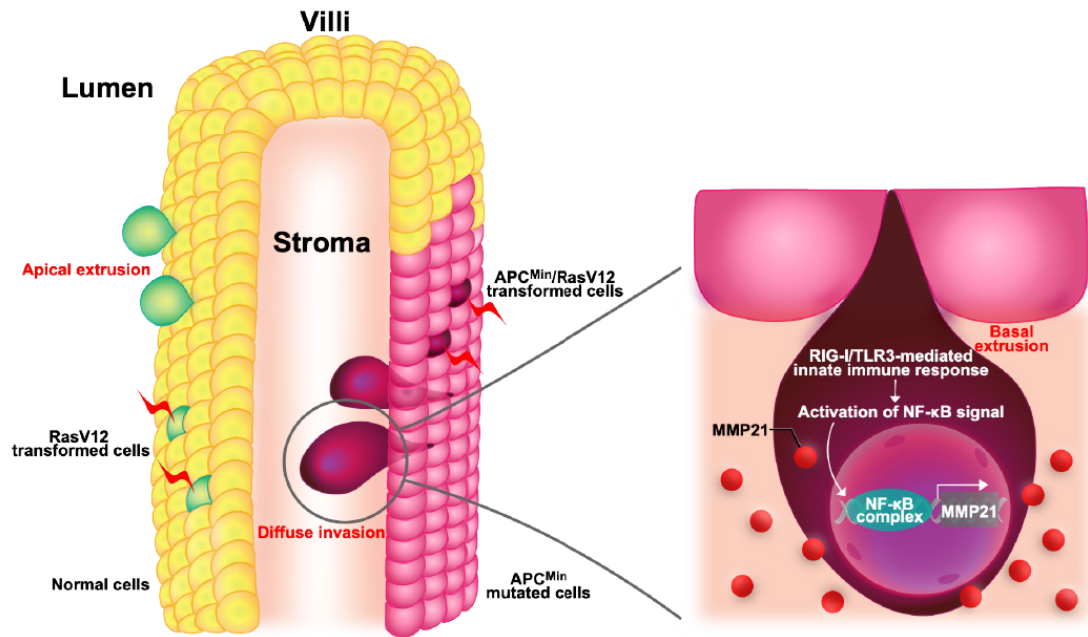

Supplementary Fig. 10. A schematic model for molecular mechanisms of the diffuse invasion of APC<sup>Min</sup>/RasV12-transformed cells.

Supplementary Table 1. Primers used for quantitative real-time PCR analysis for Wnt activity of mice

| Gene      | Forward primer          | Reverse primer         |
|-----------|-------------------------|------------------------|
| ACT1Nb    | CATTGCTGACAGGATGCAGAAGG | TGCTGGAAGGTGGACAGTGAGG |
| Myc       | GCCCAGTGAGGATATCTGGA    | ATCGCAGATGAAGCTCTGGT   |
| Cyclin D1 | GGCACCTGGATTGTTCTGTT    | CAGCTTGCTAGGGAAGTTGG   |
| Axin2     | GGGGAAAACACAGCTTACA     | TTGACTGGGTCGCTTCTCTT   |

Supplementary Table 2. Primers used for q-PCR analysis for  $\beta$ -cat  $\Delta$ N/RasV12 cells

| Gene   | Forward primer         | Reverse primer           |
|--------|------------------------|--------------------------|
| ACT1Nb | GGCACCCAGCACAATGAAG    | ACAGTGAGGCCAGGATGGAG     |
| MMP1   | TTCGGGGAGAAGTGATGTTT   | CTGACCCTGAACAACCCAGT     |
| MMP2   | CCACTATTGGTGGGAACTCG   | TGCGACCAGGAATAAGCTGT     |
| MMP3   | CCAAGTGGAGGAAAACCTCACC | CCAGGTCCATCAAAAAGGTTA    |
| MMP7   | ATCCATTTGATGGACCAGGA   | GTCGGATACATCACGGCATC     |
| MMP9   | ATCTTCCTGGGCAAGCAGTA   | TGGCACCGATGAATGATCTA     |
| MMP11  | CTAACGAGATTGCCCCACTG   | CCCAATACTGAGCACCCCTGA    |
| MMP13  | AGGTGCTTGTCTGGGAGAGA   | GCTCTGCAAGCTGGAAGTCT     |
| MMP14  | TGCCCAATGGAAAGACCTAC   | CATCACTGCCCATGAATGAC     |
| MMP15  | GACATCAGTGCTGCCTACGA   | CGCTGTGTCTCCTCATTGAA     |
| MMP17  | AGCCTTGCAGAGGACACACT   | TTGAGTTCTGCGTGATCCAG     |
| MMP19  | GCCATAGGAACAACCCTGAA   | GTGGCTAGTGCTGGGACATT     |
| MMP21  | ACGGGGATCCTATCCAAATC   | GGCCTGATCCTTGTCACTGT     |
| MMP23B | GGCCAGAAGATCCTTCACAA   | ACTCGCCAGGAGTAGGTGCT     |
| MMP26  | ACTGTTTTCTGCCTTGGTG    | GACGTGACACAACCAGCATC     |
| MMP28  | CAAGCCTGGACGATTTTGT    | ACTGAGCCAGGAGGTTCTGA     |
| ADAM9  | GGCACAAGATGTGACAATGG   | TCCACACTTCTCCGTATCC      |
| ADAM10 | GGGCAATGTGCAGGTTCTAT   | GATGGTTCGACCAACGAAGT     |
| ADAM15 | GGCCTCACACTGGACAATTT   | GATGCAACTCCCAGGACACT     |
| ADAM17 | CTGTGGTGCAAAAGCAGAAA   | CTGCCTAATGCCTCCCAATA     |
| ADAM18 | GACCATGCTGCACATCAAAC   | CAATACGCAGTTCCCAACCT     |
| ADAM22 | CCAGGTATGCAGAAGGTGGT   | GACACAGCAGGCAAGAATGA     |
| ADAM23 | AAGAACCCCTCTACCACCT    | CCACTGGAGTGTGTCATTGG     |
| ADAM28 | TGTGTGATGGCAAATCTGGT   | ATCCACCTTCATTCCTGCTG     |
| ADAM33 | CCCCATGTGGACCTAGAATG   | ACCAAATCCTGGCTTGTAC      |
| RIG-I  | AGAGTGGTGGAGGAATGCCA   | GTTCCGTCTGGCACAGAAGAT    |
| TLR3   | AGCAAGTTGAAGCTGGCTGT   | CTGCGATCTCGAAAGTGAAACATC |
