# Supplementary material for: Wnt activation disturbs cell competition and causes diffuse invasion of transformed cells through NF-κB-MMP21 pathway
Source: PubMed Central journal article supplement (PMC10624923; doi:10.1038/s41467-023-42774-6), 2023-11-03
Supplement: 41467_2023_42774_MOESM3_ESM.pdf [file 41467_2023_42774_MOESM3_ESM.pdf]

## Description of Additional Supplementary Files

### Supplementary Data 1

A list of differentially expressed genes in  $\beta$ -cat  $\Delta$ N/RasV12 cells co-cultured with  $\beta$ -cat  $\Delta$ N cells compared to  $\beta$ -cat  $\Delta$ N/RasV12 cells cultured alone.
